# Supplementary material for: Trichodesmium physiological ecology and phosphate reduction in the western tropical South Pacific
Source: Copernicus journal article supplement (doi:10.5194/bg-15-5761-2018), 2018-10-02
Supplement: Supplementary file 1 [file supp_table_1.xlsx]

## Sheet: Sheet1
Station	Lat	Lon	Water colum dissolved inorganic phosphorus (nmol/L) at 10 m		Water column phosphate turnover (1/hr)		Phosphate turnover time (hrs)	Water column phosphate uptake rate (nmol/L/hr)	Water column iron (nmol/L) at 10 m	Tricho. colony: % of PO4 uptake as MPn		Tricho. colony: % PO4 uptake as PO3		Sum MPn PO3 (%)
			avg.	stdev	avg	stdev				avg	stdev	avg	stdev
SD1	-18	159.901	11.2	0.5376					0.67
SD2	-18.6223	162.115	16.4	0.7872					0.36	0.826437	0.116559	1.04518	0.326903	1.87162
SD3	-19.4982	165.001	8.3	0.3984	0.0251265	0.00127681	39.7986	0.20855	0.38
LDA	-19.2428	164.64	13.8*	0.6624	0.0493767	0.00308881	20.2525	0.681398	0.85	0.545586	0.118689	0.554668	0.000872005	1.10025
SD4	-19.9995	168	4.8	0.2304					0.69
SD5	-22.0008	170	2.3	0.1104	0.00260763	0.000387691	383.49	0.00599755	0.44
SD6	-21.371	172.117	13.4	0.6432
SD7	-20.7697	174.25	10.21	0.49008	0.00293293	1.46184e-05	340.956	0.0299452	0.21
SD8	-20.7027	176.378	8.2	0.3936	0.00120814	0.000871328	827.721	0.00990672	0.38
SD9	-20.9687	178.643	6.1	0.2928	0.0388792	0.000444154	25.7207	0.237163	0.22	0.579056	0.143808	0.773547	0.00477554	1.3526
SD10	-20.4535	-178.51	6.6	0.3168					0.97
SD11	-19.9882	-175.667	6.6	0.3168	0.0365547	0.000240783	27.3563	0.241261	1.16	0.338293	0.00486217	0.546209	0.00901143	0.884501
SD12	-19.5237	-172.788	18.7	0.8976	0.00192657	0.000764454	519.058	0.0360268	0.94*
LDB	-18.1877	-170.666	7	0.336	0.0694248	0.00443861	14.4041	0.485974	0.65	1.20256	0.284958	0.80124	0.376369	2.0038
SD13	-18.2007	-169.073
LDC	-18.4158	-165.939			0.504058	0.278547	1.9839		0.37
SD14	-18.395	-163.001	214	10.272					0.46
SD15	-18.2682	-159.999	230	11.04					0.31
