# Supplementary material for: Trichodesmium physiological ecology and phosphate reduction in the western tropical South Pacific
Source: Copernicus journal article supplement (doi:10.5194/bg-15-5761-2018), 2018-10-02
Supplement: Supplementary file 2 [file supp_fig_2.pdf › supplemental_zip_final/supp_fig_2.pdf]

a

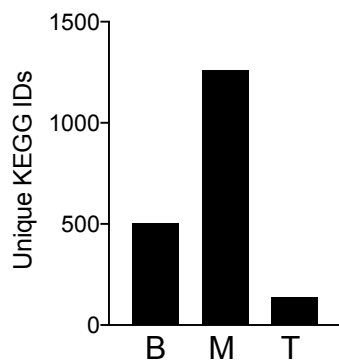

b

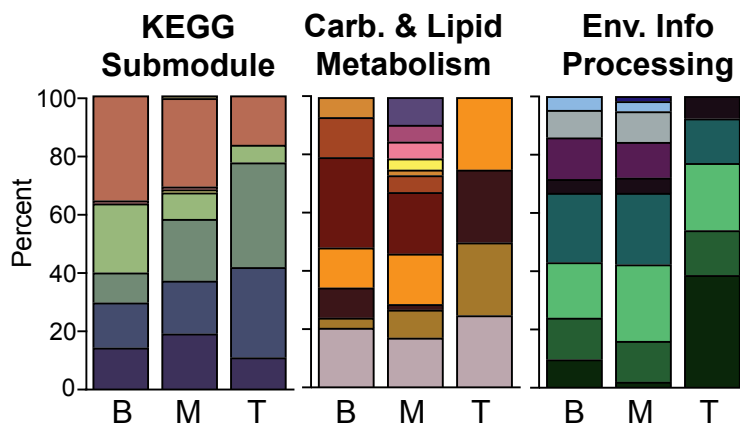

**KEGG Submodule**

- Carbohydrate and lipid metab.
- Energy metab.
- Environmental info. processing
- Genetic info. processing
- Metabolism
- Nucleotide and AA metab.
- Secondary metab.
- Genotypic signature

**Carb. & Lipid Metabolism**

- Carb. metabolism
- Terpenoid biosynth.
- Terpenoid backbone biosynth.
- Central carb. metabolism
- Other carb. metabolism
- Sugar metabolism
- Lipopolysaccharide metabolism
- Lipid metabolism
- Sterol biosynthesis
- Fatty acid metabolism
- Glycan metabolism

**Env. Info Processing**

- Peptide and nickel transport
- Phosphate and AA transport
- ABC transport
- Two-component reg. system
- Bacterial secretion system
- Saccharide and polyol transport
- Mineral and org. ion transport
- Iron and B12 transport
- Phosphotransferase system
