# Supplementary material for: Trichodesmium physiological ecology and phosphate reduction in the western tropical South Pacific
Source: Copernicus journal article supplement (doi:10.5194/bg-15-5761-2018), 2018-10-02
Supplement: Supplementary file 2 [file supp_table_2.xlsx]

## Sheet: Sheet1
Clade I (VI-I type)					Clade III (IMS-101 type)					Total Cells
Station #	Depth (m)	Cells/Liter	SD		Station #	Depth (m)	Cells/Liter	SD		Station #	Depth (m)	Cells/Liter
2.1	105.334	49.2182	3.53711		2.1	105.334	0	0		2.1	105.334	49.2182
2.2	70.315	256.519	46.1897		2.2	70.315	0	0		2.2	70.315	256.519
2.3	35.881	16935.7	3178.65		2.3	35.881	4241.04	187.768		2.3	35.881	21176.8
2.4	15.452	78277.2	11013.8		2.4	15.452	34467.8	2706.92		2.4	15.452	112745
2.5	8.532	40360.9	6311.34		2.5	8.532	17495.4	1212.01		2.5	8.532	57856.4
2.6	5.451	78681.7	1277.21		2.6	5.451	21452.4	2785.86		2.6	5.451	100134
4.1	106.415	63.9807	8.21195		4.1	106.415	0	0		4.1	106.415	63.9807
4.2	69.981	1222.95	285.073		4.2	69.981	0	0		4.2	69.981	1222.95
4.3	35.462	12498.8	1218.82		4.3	35.462	1457.31	183.754		4.3	35.462	13956.1
4.4	16.726	11120.7	1051.08		4.4	16.726	5596.86	161.162		4.4	16.726	16717.6
4.5	9.636	44795.7	8852.79		4.5	9.636	28478.1	4533.35		4.5	9.636	73273.8
4.6	4.299	24450.1	4167.23		4.6	4.299	22152	1674.11		4.6	4.299	46602.1
6.1	119.675	581.665	154.766		6.1	119.675	0	0		6.1	119.675	581.665
6.2	79.678	1456.09	99.2801		6.2	79.678	391.014	49.5968		6.2	79.678	1847.1
6.3	40.703	6462.53	376.484		6.3	40.703	4515.22	99.3545		6.3	40.703	10977.7
6.4	18.173	40658.7	8811.3		6.4	18.173	13284.3	1015.35		6.4	18.173	53943
6.5	11.234	149155	10230.4		6.5	11.234	22935.2	3787.89		6.5	11.234	172090
6.6	5.381	82856.4	13163.6		6.6	5.381	23110.8	6456.73		6.6	5.381	105967
9.1	134.661	108.494	15.8264		9.1	134.661	0	0		9.1	134.661	108.494
9.2	90.079	44.1214	10.0715		9.2	90.079	0	0		9.2	90.079	44.1214
9.3	45.179	5761.77	1220.23		9.3	45.179	2483.23	194.066		9.3	45.179	8245
9.4	21.532	4628.82	1255.19		9.4	21.532	3010.94	171.885		9.4	21.532	7639.76
9.5	12.516	6162.76	345.634		9.5	12.516	3067.23	136.498		9.5	12.516	9229.99
9.6	4.331	20587.2	717.25		9.6	4.331	9164.47	2635.38		9.6	4.331	29751.7
11.1	135.829	14.1738	4.02826		11.1	135.829	0	0		11.1	135.829	14.1738
11.2	89.593	72.9504	4.1978		11.2	89.593	0	0		11.2	89.593	72.9504
11.3	46.067	2152.23	383.276		11.3	46.067	1153.82	55.6065		11.3	46.067	3306.05
11.4	21.388	20241.1	1360.48		11.4	21.388	18049.4	1381.87		11.4	21.388	38290.5
11.5	12.349	12213.6	770.563		11.5	12.349	8402.08	1165.03		11.5	12.349	20615.7
11.6	5.836	36343.3	1861.8		11.6	5.836	28713.6	5077.47		11.6	5.836	65056.9
12.1	127.484	13.3411	4.36224		12.1	127.484	0	0		12.1	127.484	13.3411
12.2	84.811	114.116	7.07854		12.2	84.811	0	0		12.2	84.811	114.116
12.3	43.39	24045.9	1552.06		12.3	43.39	4784.42	327.223		12.3	43.39	28830.3
12.4	19.163	15179.6	2300		12.4	19.163	5259.23	47.6945		12.4	19.163	20438.9
12.5	10.493	10852.2	2110.81		12.5	10.493	6513.01	1419.06		12.5	10.493	17365.2
12.6	5.745	2990.12	366.523		12.6	5.745	2011.18	386.347		12.6	5.745	5001.3
14.1	165.171	56.8642	0		14.1	165.171	0	0		14.1	165.171	56.8642
14.2	110.711	107.764	23.7472		14.2	110.711	0	0		14.2	110.711	107.764
14.3	56.22	89.3662	11.957		14.3	56.22	0	0		14.3	56.22	89.3662
14.4	26.263	70.6231	8.45765		14.4	26.263	0	0		14.4	26.263	70.6231
14.5	15.301	86.1093	33.8245		14.5	15.301	0	0		14.5	15.301	86.1093
14.6	6.013	72.0322	12.3675		14.6	6.013	0	0		14.6	6.013	72.0322
15.1	174.161	14.6228	9.36892		15.1	174.161	0	0		15.1	174.161	14.6228
15.2	115.723	15.7987	3.85407		15.2	115.723	0	0		15.2	115.723	15.7987
15.3	58.027	13.9256	0.109141		15.3	58.027	0	0		15.3	58.027	13.9256
15.4	26.581	65.2034	11.4841		15.4	26.581	0	0		15.4	26.581	65.2034
15.5	16.807	73.2409	9.41521		15.5	16.807	0	0		15.5	16.807	73.2409
15.6	5.44	67.0727	1.2496		15.6	5.44	0	0		15.6	5.44	67.0727
