# Supplementary material for: Trichodesmium physiological ecology and phosphate reduction in the western tropical South Pacific
Source: Copernicus journal article supplement (doi:10.5194/bg-15-5761-2018), 2018-10-02
Supplement: Supplementary file 4 [file supp_fig_4.pdf › supplemental_zip_final/supp_fig_4.pdf]

- 1. O86937\_PEPM\_Streptomyces
- 2. P56839\_PEPM\_Mytilus\_edulis
- 3. P33182\_PEPM\_Tetrahymena\_pyriformis
- 4. WP\_070393116\_PEPM\_Moorea\_producens
- 5. outpace\_tricho\_scaffold\_3391\_1
- 6. WP\_042155018\_PEPM\_Planktothrix\_agardhii

MNATEPGSDGTCPESEVCSRLNLIHGPGTCCLVGVHDGLSARIVAAEGFIALWASGLCMSIARIGVRDSDPASWTELLTIVGTML  
MSITKVKKTTTOLKQMLNSKDLEFIMEAHNGLSARIVQEA/GFKGIWGSGLSVSAQLGVRDSNEASWTQVVEVLEFMS  
MLANSLKSFESTRKTTOLKNTIQSKDLSFIMEAHNGLSARIVVEE/GFKGIWGSGLSVSAQLGVRDSDNEASWTQVLEVLEFMS  
MKTTAQLTKTTEPRKATQLRKTIQPRKTTOLKNTINSKQLEFIMEAHNGLSARIVVEE/GFKGIWGSGLSVSAQLGVRDSDNEASWTQVLEVLEFMS  
MLRKTTTQLKNTLQSEKLEFIMEAHNGLSARIVVEE/GFKGIWGSGLSVSAQLGVRDSDNEASWTQVLEVLEFMS  
MIRKTTTKLRCLDSSQCLEFIMEAHNGLSARIVVEE/GFKGIWASGLSVSAALGVRDSDNEASWTQVLEVLEFMS

- 1. O86937\_PEPM\_Streptomyces
- 2. P56839\_PEPM\_Mytilus\_edulis
- 3. P33182\_PEPM\_Tetrahymena\_pyriformis
- 4. WP\_070393116\_PEPM\_Moorea\_producens
- 5. outpace\_tricho\_scaffold\_3391\_1
- 6. WP\_042155018\_PEPM\_Planktothrix\_agardhii

EAPGAPVPLVGGDTGYGNENTAMPSPAPSCLGAGVCFFEDKVEPKNSFFGDGHG--LAPIGEFGKIKACKDTDRPCGVAVARTEAULSNLP  
DASGV--PILLQADDTGYGNFNARRLVKLEPRGVASACLEDKLEPKNSLHDGRAQPLADIEEFALKIKACKDSSTTPDECTIVARVEAFIAGWGL  
RRTKI--PILLGGDTGYGNYNARRLVKKLEQRSTAGVCLLEDKLEPKNSLDDGRGELAPINEFVAKIKACKDTTQADECVVARVEAFIAGWGL  
DATSI--PILLGGDTGYGNFNARRLVKKLEQRGVAGVCILEDKLEPKNSFIKGTACPLADMDEFCKIKAKADASDDDEVLITARVEAFIAGWGL  
DATSI--PILLGGDTGYGNFNARRLVKKLEQRGVAGVCILEDKLEPKNSFIDGHTQPLADIEEFCKIKAKADAKDNDVVISRVEAFIAGWGL  
DATSI--PILLGGDTGYGNFNARRLVKKLEQRGVAGVCILEDKLEPKNSFINGTAPLADIDEFCKIKAKADAKLDEDFVIARVEAFIAGWGL

- 1. O86937\_PEPM\_Streptomyces
- 2. P56839\_PEPM\_Mytilus\_edulis
- 3. P33182\_PEPM\_Tetrahymena\_pyriformis
- 4. WP\_070393116\_PEPM\_Moorea\_producens
- 5. outpace\_tricho\_scaffold\_3391\_1
- 6. WP\_042155018\_PEPM\_Planktothrix\_agardhii

FEATIRAFAYVEVADGIFTHSRMSTQCIAEEMCCDGSAPLIIAPITVYRPSLDC--AALGIAAGCIWANHSMRAAFIAMEDVCCQITRADRCIFG  
DEALKRAEAYRNAGADAILMHSKKACDSDEIATNMAINNOGPPVIVPTKYKTPTDTERDVGVSMTIWANHNLRASVVAIQTTKQIYCDQSLVN  
FEALKRAEAYRNAGADAILMHSKKLESEIEATNKEWKNRSPVIVPTNYTPTDTERKWGVNMTIWANHMRACVAMQETSRRITYDESLVN  
SEALKRACAYYDAGADGILHSAALRVDEILATKEFGDRAPVIVPTKYATPTPEVRDAGFSIATWANQLLRASVIMTQKVAQQIMMEQNLLN  
SEALKRAEAYYHAGADGILHSSLRVDEILATKEDWGDRCAPVIVPTKYTTPTQVREDYKFSIATWANQTLRAAITEMQKIVNKLSCQENLLD  
SEALKRAEAYHAGANGILHSSLRVDEILATKSEWGNRCPPVIVPTKYTTPTQVREDYQFSIATWANQVCRAAITAMQOATKRITFTENILLN

- 1. O86937\_PEPM\_Streptomyces
- 2. P56839\_PEPM\_Mytilus\_edulis
- 3. P33182\_PEPM\_Tetrahymena\_pyriformis
- 4. WP\_070393116\_PEPM\_Moorea\_producens
- 5. outpace\_tricho\_scaffold\_3391\_1
- 6. WP\_042155018\_PEPM\_Planktothrix\_agardhii

VEERVAPIKETLCIDYESLECDENRYTQAP-----DLAPVGS  
VEDKIVSVKETERLQRDDLVQAECKYLPKN  
VEPKVAKKKEVFRLOGEDELKQADKKYI  
VEDKIVPVAFETERLQGVAEHAFAEQRYLPQNGGGIRTVLLAASRGIELGQFTKDKPKCMVNLQCQPLLSTRIVHEVHSVGIQDITVVRGYKKGVAN  
AEESTIPVSEVFRLOGCLELQEAELLYLPQNKKIASLLAASRGIELGTFTKEKPKCMLTLKRKPILLQTIATIHHELGTKNSVVRGYKKEATN  
IIECTIPVSEVFRLOGALFLQAAEKRYLPQNQKQSSALLAASRGIELGEFTLDKPKCMLLEKCKPLLQVADTYRMVGIKETIVVRGYKKEVIN

- 1. O86937\_PEPM\_Streptomyces
- 2. P56839\_PEPM\_Mytilus\_edulis
- 3. P33182\_PEPM\_Tetrahymena\_pyriformis
- 4. WP\_070393116\_PEPM\_Moorea\_producens
- 5. outpace\_tricho\_scaffold\_3391\_1
- 6. WP\_042155018\_PEPM\_Planktothrix\_agardhii

IFGLDFVDNDDYDTTIGELVSLSRGLQELPQD--GDDWLTIGYGDVLFKKYILQMLSGVDHDFVVIIDSSQHRQTEQIRPDYVACSLPDSITQAFYQH  
IANIKYVDNDEYESTGEIFSYLGLKKTIQDNEQDNLVIGYGDVILKKYILQILLNNYDLAVLDSSNHHKCSNQVRADYTNCSVPNSKRAFQD  
IPNNYLDNDDYDSTGELISLQLGLQFSQGG--NQDILTIGYGDVLFKKYVLQILLDNHDFVNVVDANSQGCQSNVSRPDYVSCSLPNSKQAFYTE

- 1. O86937\_PEPM\_Streptomyces
- 2. P56839\_PEPM\_Mytilus\_edulis
- 3. P33182\_PEPM\_Tetrahymena\_pyriformis
- 4. WP\_070393116\_PEPM\_Moorea\_producens
- 5. outpace\_tricho\_scaffold\_3391\_1
- 6. WP\_042155018\_PEPM\_Planktothrix\_agardhii

VDLQQTSHETPECEICGRWTGLTKVSSQGGOKLRDTLNTLLQSQQVROQGRMPTILNRLITDGRVHVLYIKGHWLDIDOVEDIFKAGSE  
GCLIQIDANPPEKICGMWTGLTKVSSNVGRPLILALEKILLQLEISSSGRMPLNINELALGYPMNVVYITGDWLDVDEVEDNIKAGT\*  
NYLQQTNNQESSEICGMWTGLTKVSSQGGOKLRDTLKSLLLEETAKQOGRMPLNINELKLGYPICVITYITGNWLDIDEDNIKAGSE

Residues involved in cofactor and substrate interactions

Residues involved in tertiary enzyme structure
