# Supplementary material for: Trichodesmium physiological ecology and phosphate reduction in the western tropical South Pacific
Source: Copernicus journal article supplement (doi:10.5194/bg-15-5761-2018), 2018-10-02
Supplement: Supplementary file 4 [file supp_table_4.docx]

>scaffold_3391_ppm_cassette_trichodesmium

ATTTTGTAACCCTTTTTTCTGCTATCCCTTTGCTCCATCTCCTGACTCGTGACTCCTGTACCTCGCCCTA

CTGACGGCTCCCCTACCCGATCAAAAAACTTAATAGTGGCTATTGATACCAAATGGGTTCTATAGAGTTG

GAAGTTGTTGAATGAATTTTTGGTAGTCCATTTTGGTCTGTTGGTTCTTTGGGGTTATTGTAGAGGTTGG

TTGAGTGGGGGGCGATCGTTTTTGTGGGGAAATGGGGAATAATTAGAGGTGTTAAAGTTTTCTACTCCCT

TCCCGGAGTAATACATTCAGTATAATTATAATTATGTCCGTTAACAAGATAAGTTTATGCTCAGAAAAAC

AACCCAATTGAAGAACTTACTGCAGTCAGAAAAATTGGAATTTTTGATGGAAGCTCATAACGGCTTGAGT

GCAAAAATTGTAGAAGAAGCAGGCTTTAAGGGCATTTGGGGGAGCGGTCTTTCAATTTCGGCAGCAATGG

GTGTCAGGGATAATAATGAAGCTAGCTGGACTCAGATCTTAGAAATTCTGGAGTTTATGTCTGATGCTAC

CTCAATTCCTATTTTACTAGATGGTGACACGGGTTATGGTAACTTTAATAACTTACGACGTTTGGTAAAA

AAACTAGAGCAGCGTGGTGTGGCAGGAGTTTGTATTGAAGATAAACAGTTTCCGAAAAAAAATAGTTTTA

TTGACGGTCATACTCAACCACTAGCTGATATAGAAGAGTTTTGTGGCAAAATCAAAGCAGCAAAAGATGC

TCAAAAGGATAATGATTTTGTAGTAATTTCTCGTGTAGAAGCTTTTATTGCCGGTTGGGGTTTGTCAGAA

GCACTAAAACGGGCAGAAGCATATTATCATTCCGGAGCTGACGGAATTTTGATTCACAGTTCTCTAAGAG

TTCCAAATGAAATTTTGGCATTTAAACAAGATTGGGGCGATCGTTGTCCTGTAATTATTGTGCCGACTAA

GTATTATACTACTCCCACTCAAGTATTTAGAGATTACAAGTTCTCAATTGCTATTTGGGCCAATCAAACT

CTAAGGGCGGCGATCACAGAAATGCAGAAAATAGTTAATAAATTATCGCGACAAGAAAATTTACTGGATG

CAGAAGAGTCAATTATTCCTGTTTCTGAGGTTTTTAGACTTCAAGGTTGCCTTGAGTTACAAGAAGCAGA

AAAACTTTATTTACCCCAAAATAACAAAAAAATAGCAAGTTTATTGTTAGCAGCATCTAGAGGTATAGAA

TTAGGAACTTTTACTAAAGAAAAACCTAAATGTATGTTGACTTTAAAAAGAAAGCCGATTTTAGGACAAA

TAATAGCTATTCATCATGAAATAGGAATAAAAAATATTAGTGTTGTTCGCGGTTATAAAAAAGAAGCTAT

TAATTTAGCCAACATTAAATATGTAGATAACGATGAATATGAGTCAACGGGGGAAATATTTTCCCTCTAT

TTAGGCTTGAAAAAAATCATTCAAGATAATGAAAATCAAGACCTAGTAATTGGCTATGGTGATGTGTTAT

TGAAAAAGTATATACTGCAACTCCTCTTAGAAAATAATTATGACTTGGCAGTAATAGTTGATAGCAACTG

GCATAAATGCTCGAATCAAGTTAGGGCAGATTATACTAATTGCTCTGTACCTAATTCTAAACGAGCATTT

TATCAAGATGTTGGCTTACACCAAATAGACGCAAATATGCCAGAAGAAAAAATTTGTGGAATGTGGACTG

GTTTACTGAAAGTTTCAAGTAACGTGCAAAGACCATTATTAGATGCTCTTGAAAAGTTACTTCTACAGCT

GGAAATCAAAAGTAGCGGTAGAATGCCAAACTTGATAAATGAGTTAATTGCTTTAGGATATCCAGTTAAT

GTGGTTTACATTACAGGAGATTGGTTAGATGTAGATGAAGTAGAAGATATGATCAAGGCGGGAACTTTTT

AAATGATTAAAGCAGAAAACTTTTTTGAAGTTGCAGGCAAACTAGGATTTGGCTTATATACAGGGGTTCC

CTGTTCTTACCTGAAGTCTTTTATAAACTATGTAATTGATTCTCCTGACTTGCGGTATGTAGGTGCTACA

AATGAGGGAAATGCGGTAGCTATCGCCTCTGGTGCAGAATTAGCCGGAGTTAGAAGTGTGGTTATGTTGC

AGAATTCTGGTTTGGGTAATGGGGTTAACCCGCTAACATCTCTGAATCAAACCTTTAAAATACCAATTTT

AGTAATTGTTACATGGAGAGGTCAACCGGATGATTCCCCTGACGAACCACAACATCAGCTAATGGGAGCT

ATTACCCCTAAGCTCTTAGAACTTATGCAAATTCCTTGGGAGTATTTTCCGACAGAAACAGATCGGATTG

AGTCAACCCTAAATCGTGCTGTAGAGTGTATGGAAACTTACCAAACTCCTTATGCGCTGTTAATGAAAAA

AGGAACAGTAGAATCTTACGACTTAAAATCTGAGTTAATTACAAAACAAATAAATTTGAGAAAAGATGAT

CATGCTCCCAATCAAAATTATAGCTTTTCCCGTAACGAAATGCTGCGAAGTATCCAAGCAGCGATTACTT

CAAAAGATATTTTGCTAGCCACTACAGGTTACACGGGTAGAGAACTTTATGCTATTGGAGATAGAGATAA

TCAAATGTACATGGTTGGTTCTATGGGTTGCGTTTCTAGTTTGGGGCTCGGCATTGCTTTAGCAAAACCT

CAACGGCGAATAGTTGTTGTAGATGGAGATGGAGCAGTATTAATGCGTTTGGGAGCTTTGGCCACCATAG

GTTATGAACGTCCTAGCAACTTGCTACACATCCTTTTAGATAATCAAAAGCACGAATCAACAGGGGGTCA

GTCCACTGTGTCTAATTCTATCAATTTGGGAGCGATCGCTGCAGCTTGTGGTTATGAAAAAGTTGCCGTA

GCTCAAACACCAGGCCAGCTTGAGGTTTTAGTTCAATCTTCGGAGGAAAAATTAACCTTCCTCCACGTTA

AGATCCAACCAGGAGTACCTTCTCAATTACCGAGACCTAGCGTAGCCCCACCTCAAGTAGCCCAACGTTT

ACGACAGTTTATCCAGGTACCATGATGGAACAAAATCGAACCATACTTCTTAATCCGGGTCCTGTAACTT

TGACCGAAAGAGTGCGTCATGCTTTGCTGAGAGAAGATTTGTGTCATCGCGAACCAGAGTTTGCTTCTTT

GACTTTAGATATCAAAAATCGCTTGGTTAAGGTTTACCCAGAAGCAACAACTGACTACGAAGCCATCCTG

CTTACAGGTTCAGGAACTTGTGCCGTGGAAGCAATGCTATCAAGTCTAATTCCCCAAAATGCTAAAGCAA

TAGTAGTGACTAATGGAGTTTATGGGGAACGTATGGCAAAAATGTTAGAGCTTCATTGTAAGTCATTGGA

TGTAGTTTCTTCCCAGTGGCACGAACCAATGAATCTTACTGAAGTTGAGAAACGAATAGAGCAAGATTCC

GCTATTACTCATGCGATTGCCGTTCACCATGAGACCACCACTGGTAGGCTCAATGACATCGCCAAGCTTG

CTGAAATATGTAAAAGTAGAAATATAGCTATTTTATTAGATTGTGTTTCGAGCTTTGGTGCAGAAAAAAT

AGAATTTGCTCCTTGGAACTTAGAAGCTTGTGCGGCAACGGCTAACAAATGTCTGCATGGTTTACCAGGG

CAATCATTTGCGCTGGTCAAAAAATCTGTTTTTGAATCTCGTCCTTCGGGGGCTAGAAGTCTCTATCTAG

ATTTGTACTCCTATCACCGAGAACAAGTTAATGGATATTCACCTTTTACTCAATCAGTACAGATTAGCTA

CGGACTACAGGAAGCTCTTAAGGAAATGGAGGATATGGGAGGTTGGTTAGCAAGAAACAAATATTATTCT

AGTCTTTCTCAAATGATTAGAGAAGGTTTGGCAAAGTTAGGGGTAGAAACTTTCTTACCACGAAAAGATT

ACTCTTGTGTTTTAACTTCTTTTAAATTACCAAAAACTCACAGTTACGAACAAGTGTATGGTGCTTTAAA

AAAGAATGGTTTTATCATCTACGCAGGTCAAGGAGGACTAAAAAATCAAATTTTTAGAATCGCTAATATG

GGAGATATTCAAATTAGCGATATCGAACGTCTTTTACGATGCTTATTTAATATTTTTTAAGAAAACAGTC

AGAGAAAAAGGAATCCTAAATAATTATGACTTTTAATTGGCATGAAGTATGGGAACGCAAGGGCAATTCA

ATGACAACTAATTTAAAAGAGTTGGATGGATATGAAAGCACTAATATAGAACCCCAAAAAGTAGCAGAAC

AAATATCTAAAATTTTAGAAATTAGCAAGCACGACAAAATCTTAGAGGTGGGATGTGGTTCGGGTATGCT

AGCTCAATATTTAGAATGTGATTATGTAGGAATAGATTATTCCAAGTCCCTAGTCAAAAAGCACATTAAA

TTACTCGGCAAATCAGTGTTGCACGGTTATGCGAATGACTTGGTATTTAAGGATAATTCTTTTGATAAAG

TATTTGCATTTAGTGTTTTTCATTATTTTCCCGATGGCGTGTATGCTGATCGAGTAATTAACGAAATGAA

AAGAGTTGCTAGGCAAAAGGTATTTATTGGAGATTTACCTTTTAAGTCTAAACGTCCAGAGCATTTATTA

TTTAAAAAAGAAGAATTTATTGATTTTGAGATAACCGAAGGATTTTATAACCAAGATAGGTTTAATGTAT

TAAGAAATTGTATCCCTAAAGTATAATTCTAAAGACTTACATCAAGGTACGAATTGTAGTGTAAATACCT

GAAATAATCACAAAAAATACACCATATATAGCAGTACTGCGTAATTTTTGATTCTACTGAAATAAGAAAT

TTTTTCCACAATGATAGCAAAAAAAACAGTGAGAATTTACGTTGACATGGTAGCCGATTTATTTCATTTC

GGTCATGTCAACTTTCTGAAACAAGCTCGGTCTTTCGGCGACGAACTCGTTGTTGGCATACATTCAGATG

AGACCGTAGCTAGCTATAAACGGCAGCCAATAATGACTATGAAGGAACGTATTGCTGTTGTGGAAAGTTG

TCGTTATGTTGATCAAGTAGTCCCTAATGCTCCCTTGATTGTTAGTTTAGATTATTTGGAGCAACTGGAA

ATAGATTATTTATGTCATGGGGACGATATAGATGAAGAAAAAATTGAAAAATGGTATGGAGAAATTCGCA

GACAAGGACGTTTAAAAATCGTCGATTACACCAACAATATTTCTACTACCAATTTAATTAACCGAGTTCG

CTATCAAAGTAATAAACTTAGCTTTGTTAGTCAACGAATCAAAGTTGATTTTATTGCTTATCATGATTTA

CAAGCACAAGCAGGTTTATCAGTATTTCAAGCCATGAACCAACACTTTGATTGTAGTTGGCTTATAGGAC

CAGATCGACAACCAACAGGAGCAACAGCTGCTGTCTTATTGGATCACACCCATCACCAACCAGCTATTAA

AAAGTCGTCTGATGGTTACAAGTATTTGTTTTATCTATCCCATGACTTAGGTGATGTCAATGTTTATCAA

ATCGAAAAACAACGTCTTAAGAACTTTAATATAATTTTTGTTCCCGGTCCTTTGCACCTAAGTAATGCGC

AAAAAGCCCTCGGTCCTATTTATGCACAACCTTATCTTAAACCGACAAGGGTTATTTTAGAAGGAGGATG

GCCTAAGTATGACCTGATGCAATTTCCAAATGAAAATAACGAACTTTGCGAAAAAATATTCAATTTTCCC

TACAAATACACGATTATATATGCTCCTACCTGGGCATATACGCGGGAATGGGAGCAAATACTTCCTCTGT

TTAGAAATCTTCAGTGTAACTTGATTATCAAAAACCATATTTATGTTAATCCAGGCCAGTCGTATCCAAA

AGGCTTAGAAGCTATGTATGAAGACTGTCTTACCTCGGCTAATGAAATGGAAGAGCAAGCTTTAAGTTAT

AATTTGCCAAATATTACTGTAGCCCCTAGAAATATTAACATTTGTAGTTTATTTCCATTGGCTAATGTTT

TAATTTCCGATGTGTCTTCGGTAAGTCTAGAATTTATTCCCTTTGGAATTAGTATAGAAACAGGTCGTTT

TAATCGAGATTTAAATCAACTTAAACCAGAATCAAGTTTGATATCTGATAAAGTTCATTTTCTGAAAATT

GATTGGTTAAATAAAATTTTAAGTTCTGAAGAATCTTTGCGTTCGTTCTTAGAAGAAAAATTGGCAGGGA

CTCAAAAAGAAACTATTGTCAGTTCTGAAATTAAACATTCTGGAAAATTAATAGCAACGTTAATTGATAA

ATATTTATCCTTTTGGGAAATCAAAGATTCTACTGGCAATCGTCATTCATTATTTGCAGACTGGATGAAT

CAGTGGCAAAAAGCGAAGATGTATTAGTAATAGTCTTAAGCGTGCTTGAAATCATAAATAGTTTAAAGTT

AAATATTGTTATTAAGGGTTAGTAAAAATGGCAACCAAAAGCTCTAAAATATACGAAATTGAAGGTTTAA

TAGATGAATTACCAGAGGTTTATCAATCCATATATGTTCGAGGTAATTTAATTAGGGAAGGTGTCAGAAA

AAACGATCGGGAAAGATTAGAAGTAATTAAA
