# Supplementary material for: Trichodesmium physiological ecology and phosphate reduction in the western tropical South Pacific
Source: Copernicus journal article supplement (doi:10.5194/bg-15-5761-2018), 2018-10-02
Supplement: Supplementary file [file bg-15-5761-2018-supplement-title-page.pdf › bg-15-5761-2018-supplement-title-page.pdf]

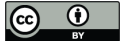

*Supplement of*

## ***Trichodesmium* physiological ecology and phosphate reduction in the western tropical South Pacific**

**Kyle R. Frischkorn et al.**

*Correspondence to:* Sonya T. Dyhrman (sdyhrman@ldeo.columbia.edu)

- bg-15-5761-2018-supplement-title-page.pdf
- supplemental\_zip\_final
  - supp\_fig\_1.pdf
  - supp\_fig\_2.pdf
  - supp\_fig\_3.pdf
  - supp\_fig\_4.pdf
  - supp\_fig\_5.pdf
  - supp\_table\_1.xlsx
  - supp\_table\_2.xlsx
  - supp\_table\_3.xlsx
  - supp\_table\_4.docx
  - supplemental\_legends.doc

The copyright of individual parts of the supplement might differ from the CC BY 4.0 License.
