# Supplementary figures and images for: Trichodesmium physiological ecology and phosphate reduction in the western tropical South Pacific
Source: Copernicus journal article supplement (doi:10.5194/bg-15-5761-2018), 2018-10-02

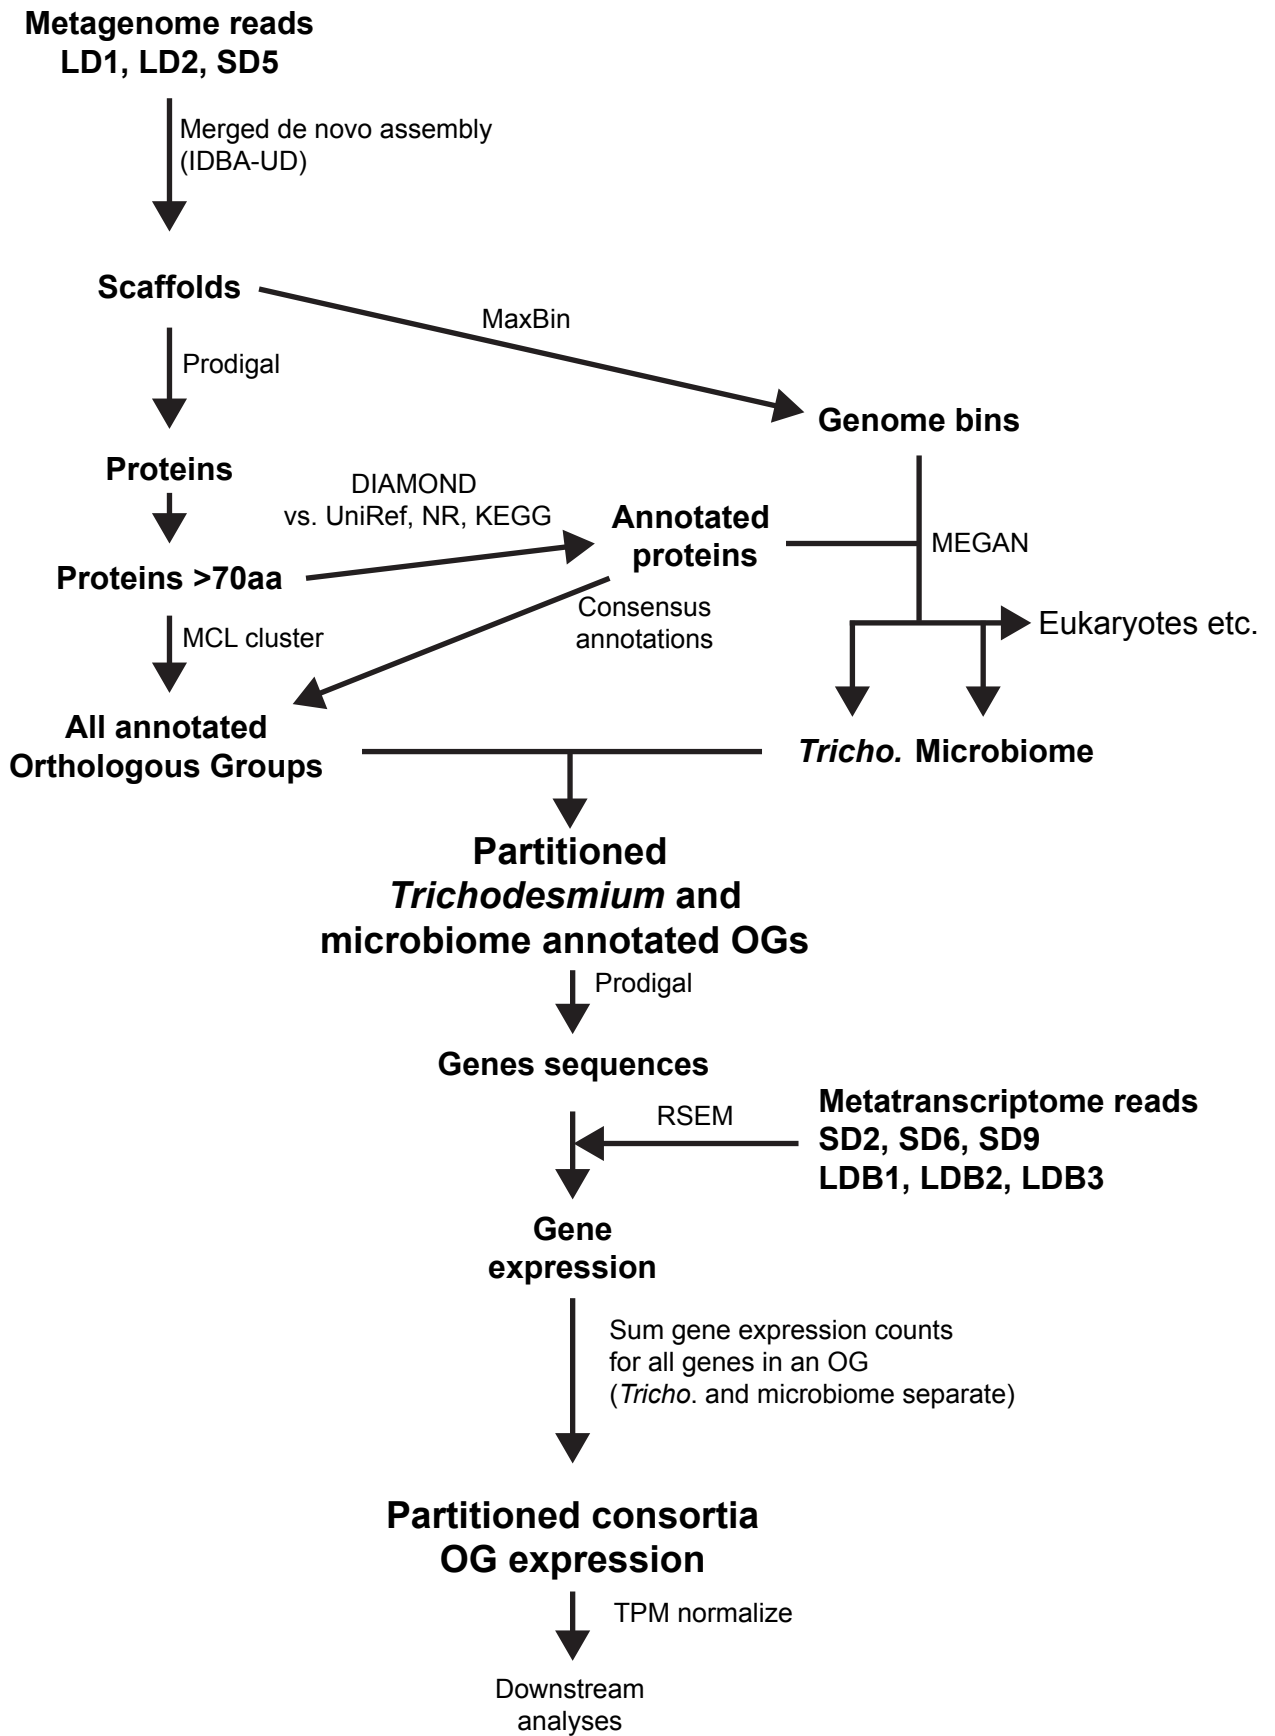

Supplement: Supplementary file 1 [file supp_fig_1.pdf › supplemental_zip_final/supp_fig_1.pdf]

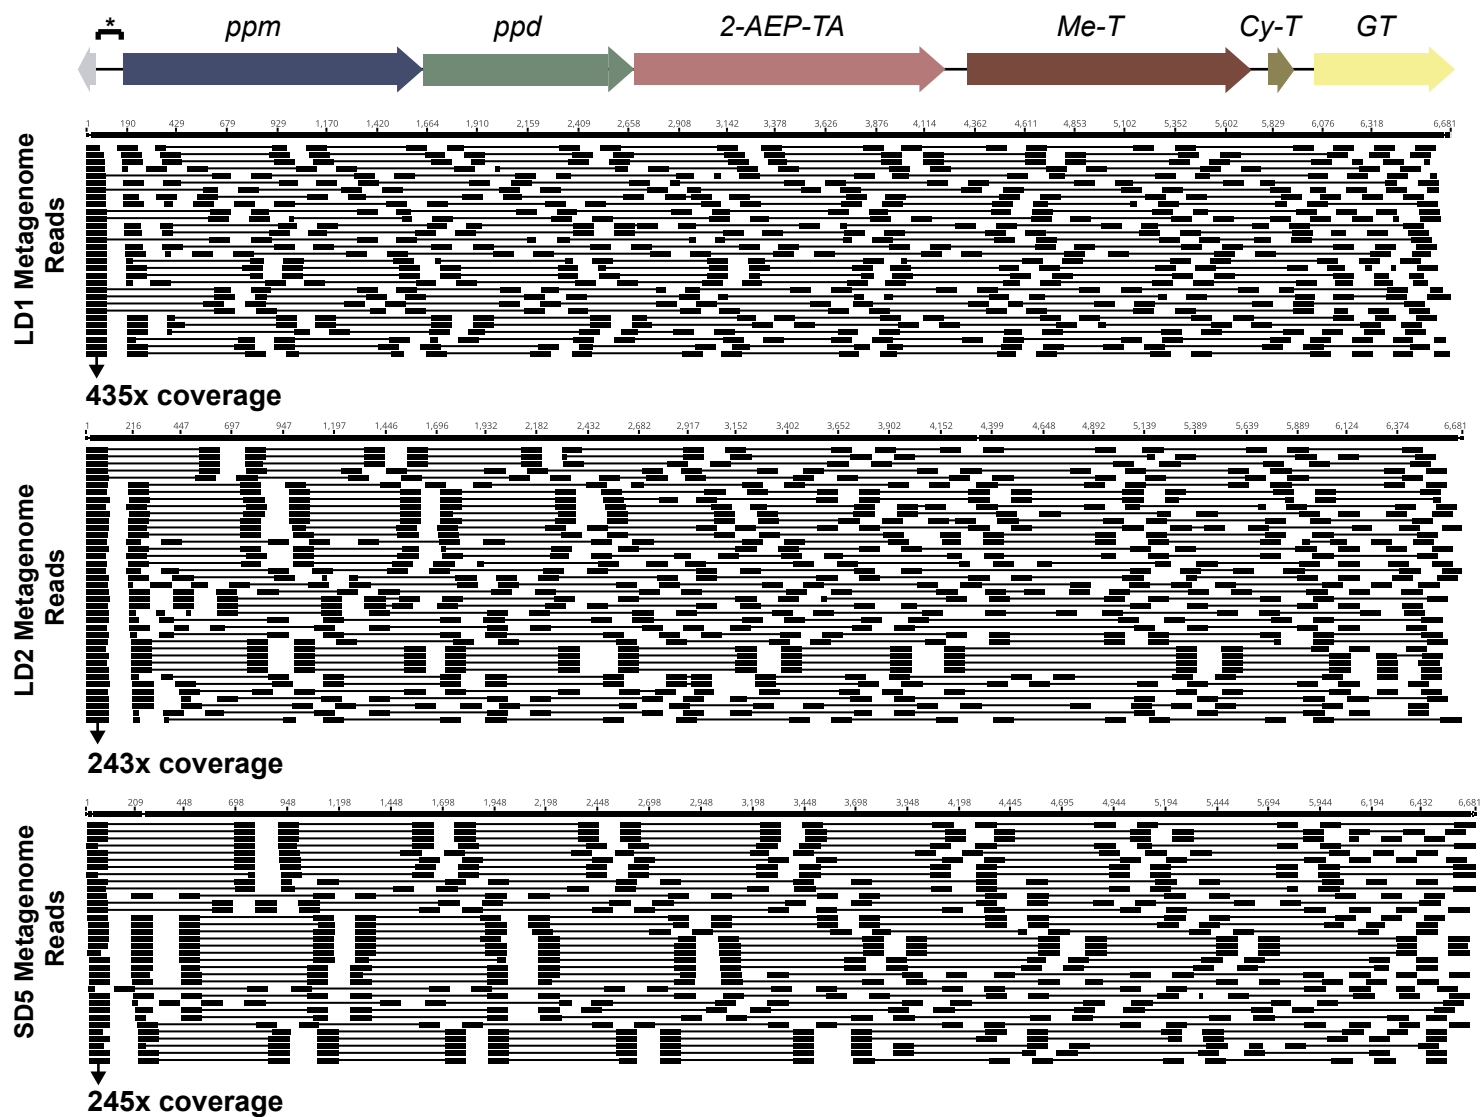

Supplement: Supplementary file 3 [file supp_fig_3.pdf › supplemental_zip_final/supp_fig_3.pdf]

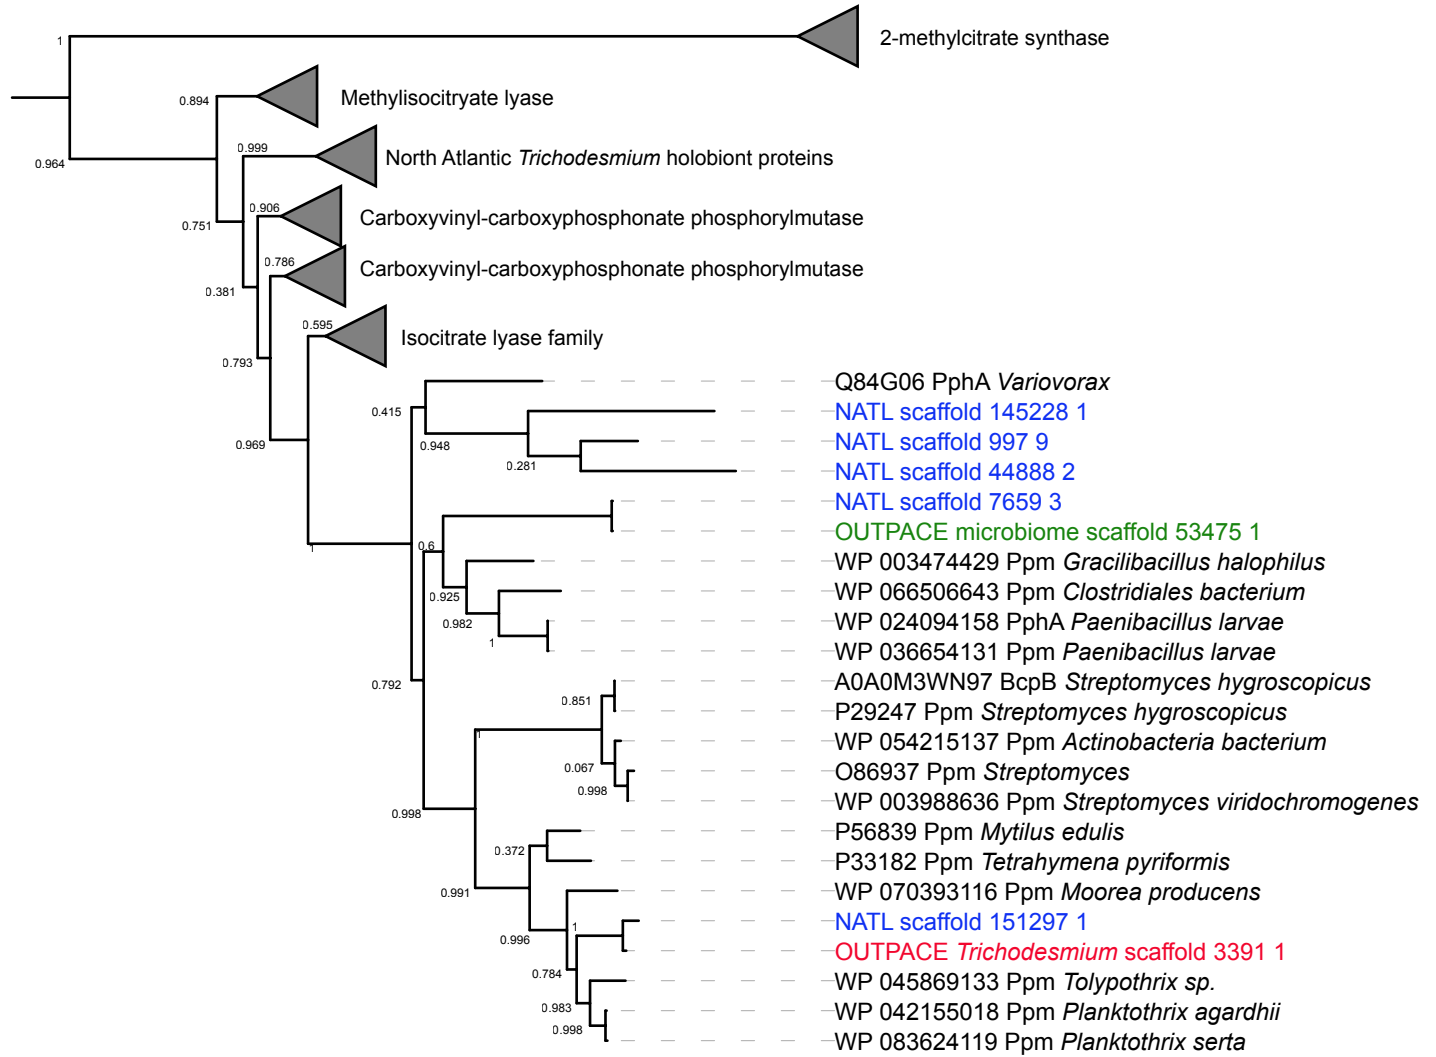

Supplement: Supplementary file 5 [file supp_fig_5.pdf › supplemental_zip_final/supp_fig_5.pdf]
